# Supplementary material
Source: MDPI journal article supplement (https://www.mdpi.com/2075-163X/9/10/568)
Supplement: s1 [file s1]

## Supplementary Materials

**Table S1.** Growth of *Talaromyces* sp. KM-31 in PDA medium amended with As(III) or As(V).

| Conc.   | 100 mg/L                                                                          | 500 mg/L                                                                          | 1000 mg/L                                                                          | No treatment                                                                        |
|---------|-----------------------------------------------------------------------------------|-----------------------------------------------------------------------------------|------------------------------------------------------------------------------------|-------------------------------------------------------------------------------------|
| As(III) | 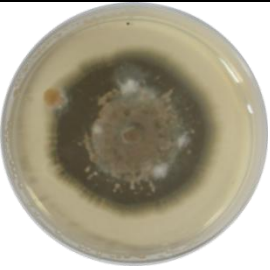 | 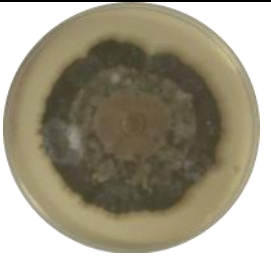 | 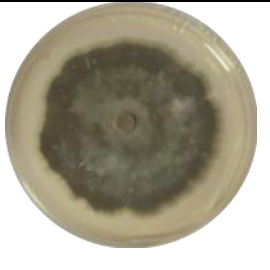 | 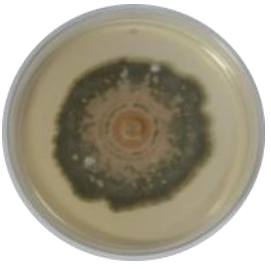 |
| As(V)   | 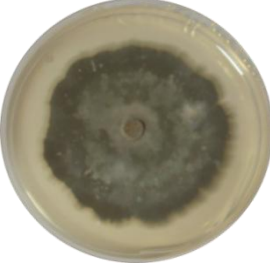 | 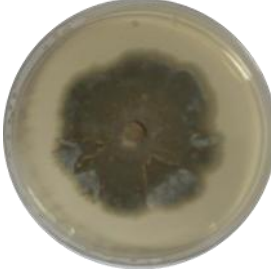 | 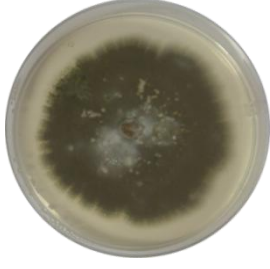 |                                                                                     |

**Table S2.** Arsenic removal (%) by Fe(III) oxides as a non-fungal reference.

| Treatment <sup>a</sup>                                             | Arsenic Removal (mean $\pm$ SD <sup>b</sup> , %) |               |
|--------------------------------------------------------------------|--------------------------------------------------|---------------|
|                                                                    | As(III)                                          | As(V)         |
| Fe(III) oxide (Fe <sub>2</sub> O <sub>3</sub> ) <sup>c</sup>       | 79 $\pm$ 0.22                                    | 78 $\pm$ 2.26 |
| Fe(II)Fe(III) oxide (Fe <sub>3</sub> O <sub>4</sub> ) <sup>c</sup> | 47 $\pm$ 9.68                                    | 50 $\pm$ 1.47 |

<sup>a</sup> Sorbent, 1 g/L; sorbate, 5 mg/L; pH 6.0; Temp, 30°C; contact time, 24 h. <sup>b</sup> The mean and standard deviation of 3 replicate determinations. <sup>c</sup> Fe(III) oxides were obtained from Aldrich and used without further treatment (particle size < 50 nm).
